# Supplementary material for: QTL Analysis and CAPS Marker Development Linked with Russet in Pear (Pyrus spp.)
Source: MDPI journal article supplement (doi:10.3390/plants11233196), 2022-11-22
Supplement: s1 [file s1]

**Supplementary Table S2.** Application of CBp08ca01 in 'Whangkeumbae', 'Minibae', and their 127 F<sub>1</sub> individuals.

| Individual   | Product size<br>(bp) <sup>1</sup> | Phenotype <sup>2</sup> | Individual | Product size<br>(bp) | Phenotype |
|--------------|-----------------------------------|------------------------|------------|----------------------|-----------|
| Whangkeumbae | 398                               | S                      | 14_110     | 398                  | S         |
| Minibae      | 264/134                           | R                      | 14_113     | 264/134              | R         |
| 14_53        | 264/134                           | R                      | 14_114     | 398                  | S         |
| 14_54        | 264/134                           | R                      | 14_115     | 264/134              | R         |
| 14_55        | 264/134                           | R                      | 14_116     | 264/134              | R         |
| 14_56        | 264/134                           | S                      | 15_1       | 264/134              | R         |
| 14_57        | 264/134                           | R                      | 15_2       | 398                  | S         |
| 14_58        | 264/134                           | R                      | 15_3       | 398                  | S         |
| 14_59        | 398                               | S                      | 15_4       | 398                  | R         |
| 14_60        | 264/134                           | R                      | 15_6       | 264/134              | R         |
| 14_61        | 264/134                           | R                      | 15_7       | 264/134              | R         |
| 14_63        | 264/134                           | R                      | 15_8       | 398                  | S         |
| 14_64        | 264/134                           | R                      | 15_14      | 264/134              | R         |
| 14_65        | 398                               | S                      | 15_15      | 398                  | S         |
| 14_66        | 398                               | S                      | 15_16      | 264/134              | R         |
| 14_68        | 398                               | R                      | 15_17      | 398                  | R         |
| 14_70        | 264/134                           | R                      | 15_18      | 398                  | R         |
| 14_71        | 398                               | S                      | 15_19      | 398                  | S         |
| 14_72        | 264/134                           | R                      | 15_20      | 264/134              | S         |
| 14_73        | 398                               | R                      | 15_21      | 264/134              | R         |
| 14_76        | 264/134                           | R                      | 15_22      | 398                  | S         |
| 14_77        | 398                               | S                      | 15_23      | 398                  | R         |
| 14_78        | 398                               | S                      | 15_25      | 264/134              | S         |
| 14_79        | 398                               | R                      | 15_26      | 264/134              | R         |
| 14_80        | 398                               | R                      | 15_27      | 264/134              | S         |
| 14_84        | 398                               | S                      | 15_28      | 264/134              | R         |
| 14_85        | 398                               | S                      | 15_32      | 264/134              | R         |
| 14_86        | 398                               | R                      | 15_36      | 398                  | R         |
| 14_87        | 264/134                           | R                      | 15_37      | 264/134              | R         |
| 14_88        | 398                               | R                      | 15_39      | 398                  | S         |
| 14_89        | 264/134                           | R                      | 15_41      | 264/134              | S         |
| 14_90        | 264/134                           | R                      | 15_46      | 264/134              | R         |
| 14_91        | 264/134                           | R                      | 15_48      | 264/134              | R         |
| 14_92        | 398                               | R                      | 15_49      | 398                  | R         |
| 14_93        | 264/134                           | R                      | 15_50      | 398                  | S         |
| 14_94        | 264/134                           | R                      | 15_51      | 398                  | S         |
| 14_95        | 264/134                           | R                      | 15_54      | 398                  | R         |
| 14_96        | 264/134                           | R                      | 15_55      | 398                  | S         |
| 14_98        | 398                               | R                      | 15_56      | 264/134              | R         |
| 14_100       | 398                               | R                      | 15_57      | 264/134              | R         |
| 14_102       | 398                               | S                      | 15_59      | 264/134              | R         |
| 14_103       | 264/134                           | R                      | 15_60      | 264/134              | S         |
| 14_105       | 398                               | R                      | 15_61      | 264/134              | R         |
| 14_107       | 264/134                           | R                      | 15_62      | 398                  | R         |
| 14_108       | 398                               | R                      | 15_65      | 264/134              | R         |
| 14_109       | 264/134                           | R                      | 15_66      | 398                  | R         |

| Individual | Product size<br>(bp) <sup>z</sup> | Phenotype <sup>y</sup> | Individual | Product size<br>(bp) | Phenotype |
|------------|-----------------------------------|------------------------|------------|----------------------|-----------|
| 15_68      | <b>264/134</b>                    | R                      | 15_101     | <b>398</b>           | S         |
| 15_69      | 398                               | R                      | 15_103     | <b>398</b>           | S         |
| 15_71      | <b>398</b>                        | S                      | 15_104     | <b>264/134</b>       | R         |
| 15_72      | <b>264/134</b>                    | R                      | 15_107     | 398                  | R         |
| 15_75      | 264/134                           | S                      | 15_110     | 398                  | R         |
| 15_77      | 398                               | R                      | 15_111     | 398                  | R         |
| 15_81      | 264/134                           | S                      | 16_1       | <b>398</b>           | S         |
| 15_82      | <b>398</b>                        | S                      | 16_2       | 398                  | R         |
| 15_84      | <b>398</b>                        | S                      | 16_4       | <b>264/134</b>       | R         |
| 15_85      | <b>398</b>                        | S                      | 16_5       | <b>398</b>           | S         |
| 15_86      | <b>398</b>                        | S                      | 16_6       | <b>398</b>           | S         |
| 15_88      | <b>398</b>                        | S                      | 16_9       | 398                  | R         |
| 15_89      | <b>398</b>                        | S                      | 16_12      | 264/134              | S         |
| 15_91      | <b>398</b>                        | S                      | 16_18      | <b>398</b>           | S         |
| 15_93      | <b>264/134</b>                    | R                      | 16_19      | <b>264/134</b>       | R         |
| 15_95      | <b>398</b>                        | S                      | 16_14      | <b>398</b>           | S         |
| 15_96      | 264/134                           | S                      | 16_15      | 264/134              | S         |
| 15_97      | 398                               | R                      | 16_16      | <b>264/134</b>       | R         |
| 15_98      | <b>264/134</b>                    | R                      |            |                      |           |

<sup>1</sup>The product sizes corresponding to the phenotype were indicated in bold.

<sup>2</sup>S, Smooth; R, russet
